# Supplementary material
Source: PubMed Central journal article supplement (PMC6563588)
Supplement: jamapsychiatry-76-904-s001.pdf [file jamapsychiatry-76-904-s001.pdf]

## Supplementary Online Content

Merz J, Schwarzer G, Gerger H. Comparative efficacy and acceptability of pharmacological, psychotherapeutic, and combination treatments in adults with posttraumatic stress disorder: a network meta-analysis. *JAMA Psychiatry*. Published online June 12, 2019. doi:10.1001/jamapsychiatry.2019.0951

**eAppendix 1.** Search Terms

**eAppendix 2.** Addition to Methods

**eAppendix 3.** Additional Results (Main Analyses)

**eAppendix 4.** Sensitivity Analyses

**eAppendix 5.** Pairwise Meta-analyses

**eFigure 1.** Flow Chart

**eFigure 2.** Risk of Bias Assessment

**eFigure 3.** Indirectness

**eTable 1.** Risk of Bias for Each Included Study

**eTable 2.** Indirectness for Each Included Study

**eTable 3.** Confidence in Network Meta-analysis (CINEMA) Rating

**eTable 4.** Comparisons of Results Across Different Network Models

This supplementary material has been provided by the authors to give readers additional information about their work.

## eAppendix 1. Search Terms

### MEDLINE (Ovid)

|              |                                                                                                                                                                                                                                                                                                                                                                                                                                                                                                                                                                                                                                                                                                                                                                                                                                                                                                                                                                                                                                                                                                                                                                                                                                                                                                                                                                                                                                                                                                                                                                                                                                                                                                                                                                                                                                                                                   |
|--------------|-----------------------------------------------------------------------------------------------------------------------------------------------------------------------------------------------------------------------------------------------------------------------------------------------------------------------------------------------------------------------------------------------------------------------------------------------------------------------------------------------------------------------------------------------------------------------------------------------------------------------------------------------------------------------------------------------------------------------------------------------------------------------------------------------------------------------------------------------------------------------------------------------------------------------------------------------------------------------------------------------------------------------------------------------------------------------------------------------------------------------------------------------------------------------------------------------------------------------------------------------------------------------------------------------------------------------------------------------------------------------------------------------------------------------------------------------------------------------------------------------------------------------------------------------------------------------------------------------------------------------------------------------------------------------------------------------------------------------------------------------------------------------------------------------------------------------------------------------------------------------------------|
| Diagnosis    | Exp Anxiety Disorders/<br><br>((trauma* adj3 stress) or (stress adj3 disorder*) or PTSD).tw.                                                                                                                                                                                                                                                                                                                                                                                                                                                                                                                                                                                                                                                                                                                                                                                                                                                                                                                                                                                                                                                                                                                                                                                                                                                                                                                                                                                                                                                                                                                                                                                                                                                                                                                                                                                      |
| Design       | randomized controlled trial.pt. OR controlled clinical trial.pt. OR randomized.ab. OR placebo.ab. OR clinical trials as topic.sh. OR randomly.ab. OR trial.ti.ab. OR groups.ab.                                                                                                                                                                                                                                                                                                                                                                                                                                                                                                                                                                                                                                                                                                                                                                                                                                                                                                                                                                                                                                                                                                                                                                                                                                                                                                                                                                                                                                                                                                                                                                                                                                                                                                   |
| Intervention | psychotherapy/ or aromatherapy/ or art therapy/ or autogenic training/ or behavior therapy/ or aversive therapy/ or "biofeedback (psychology)"/ or cognitive therapy/ or desensitization, psychologic/ or implosive therapy/ or relaxation techniques/ or meditation/ or bibliotherapy/ or color therapy/ or crisis intervention/ or dance therapy/ or gestalt therapy/ or hypnosis/ or suggestion/ or autosuggestion/ or "imagery (psychotherapy)"/ or music therapy/ or nondirective therapy/ or psychoanalytic therapy/ or free association/ or transactional analysis/ or psychotherapeutic processes/ or abreaction/ or catharsis/ or association/ or "countertransference (psychology)"/ or psychotherapy, brief/ or psychotherapy, multiple/ or psychotherapy, rational-emotive/ or reality therapy/ or socioenvironmental therapy/ or milieu therapy/ or therapeutic community/ or psychodrama/ or role playing/<br><br>(Psychotherap* or ((centered or based or focused or oriented or acceptance or attachment or behavior?r* or analytic* or brief or person or cognitive or dynamic or energetic or coherence or collaborative or contemplative or dasein* or drama* or emotion* or feminist* or sensiti?ation or existen* or exposure or gestalt or holistic or humanistic or hypno* or integr* or short-term* or shortterm* or long-term* or longterm* or interpersonal* or inter-personal* or logo* or mindfulness* or multimodal or multi-modal or narrative or positive or provocative or psychol* or rational* or reality or solution* or system* or transactional* or transpersonal or eclectic* or experiential* or expressive* or individual or insight* or persuasion or relationship or supportive* or implosive or inhibition or aversion or relaxation or talk or confront* or schema*) adj5 (treatment* or therapy or therapies)) or intervention*).tw. |
| Humans       | Humans/                                                                                                                                                                                                                                                                                                                                                                                                                                                                                                                                                                                                                                                                                                                                                                                                                                                                                                                                                                                                                                                                                                                                                                                                                                                                                                                                                                                                                                                                                                                                                                                                                                                                                                                                                                                                                                                                           |

### EMBASE (Ovid)

|              |                                                                                                                                                                                                                                                                                                                                                                                                                                                                                                                                                                                                                                                                                                                       |
|--------------|-----------------------------------------------------------------------------------------------------------------------------------------------------------------------------------------------------------------------------------------------------------------------------------------------------------------------------------------------------------------------------------------------------------------------------------------------------------------------------------------------------------------------------------------------------------------------------------------------------------------------------------------------------------------------------------------------------------------------|
| Diagnosis    | posttraumatic stress disorder/<br><br>(see Medline term list of text words referring to posttraumatic stress disorder)                                                                                                                                                                                                                                                                                                                                                                                                                                                                                                                                                                                                |
| Design       | exp controlled clinical trial/ or comparative study/ or treatment outcome/ or random*.tw. or clinical trial*.tw.                                                                                                                                                                                                                                                                                                                                                                                                                                                                                                                                                                                                      |
| Intervention | counter transference/ or crisis intervention/ or hypnosis/ or psychoanalysis/ or suggestion/ or transference/ or psychotherapy/ or art therapy/ or assertive training/ or autogenic training/ or aversion therapy/ or behavior contracting/ or behavior modification/ or behavior therapy/ or cognitive behavioral stress management/ or cognitive rehabilitation/ or cognitive therapy/ or gestalt therapy/ or guided imagery/ or milieu therapy/ or music therapy/ or pet therapy/ or psychodrama/ or relaxation training/ or role playing/ or sex therapy/ or sociotherapy/ or therapeutic community/ or validation therapy/<br><br>(see Medline term list of text words referring to psychological interventions) |
| Humans       | "Human" [Subjects]                                                                                                                                                                                                                                                                                                                                                                                                                                                                                                                                                                                                                                                                                                    |

### PsycINFO (Ovid)

|           |                                                                                                                                                                                                                                                       |
|-----------|-------------------------------------------------------------------------------------------------------------------------------------------------------------------------------------------------------------------------------------------------------|
| Diagnosis | posttraumatic stress disorder/ OR emotional trauma/ OR stress reactions/ OR traumatic neurosis/<br><br>(see Medline term list of text words referring to posttraumatic stress disorder)                                                               |
| Design    | (random* or placebo* or assign* or allocat*).mp. or (control* or compar* or ((clin* or evaluat* or prospectiv*) adj3 (trial* or studi* or study))).tw. or exp treatment effectiveness evaluation/ or exp experimental design/ or versus.id. or vs.id. |

|              |                                                                                                                                                                                                                                                                                                                                                                                                                                                                                                                                                                                                                                                                                                                                                                                                                                                                                                                                                                                                                                                                                                                                                                                                                                                                                                                                                                                                                                                                                                                                                                                                                                                                                                                                                                                                                                                        |
|--------------|--------------------------------------------------------------------------------------------------------------------------------------------------------------------------------------------------------------------------------------------------------------------------------------------------------------------------------------------------------------------------------------------------------------------------------------------------------------------------------------------------------------------------------------------------------------------------------------------------------------------------------------------------------------------------------------------------------------------------------------------------------------------------------------------------------------------------------------------------------------------------------------------------------------------------------------------------------------------------------------------------------------------------------------------------------------------------------------------------------------------------------------------------------------------------------------------------------------------------------------------------------------------------------------------------------------------------------------------------------------------------------------------------------------------------------------------------------------------------------------------------------------------------------------------------------------------------------------------------------------------------------------------------------------------------------------------------------------------------------------------------------------------------------------------------------------------------------------------------------|
| Intervention | <p>psychotherapy/ or adlerian psychotherapy/ or adolescent psychotherapy/ or analytical psychotherapy/ or autogenic training/ or brief psychotherapy/ or client centered therapy/ or cognitive behavior therapy/ or eclectic psychotherapy/ or emotion focused therapy/ or existential therapy/ or experiential psychotherapy/ or expressive psychotherapy/ or eye movement desensitization therapy/ or feminist therapy/ or geriatric psychotherapy/ or gestalt therapy/ or guided imagery/ or individual psychotherapy/ or insight therapy/ or integrative psychotherapy/ or interpersonal psychotherapy/ or logotherapy/ or narrative therapy/ or persuasion therapy/ or primal therapy/ or psychodrama/ or psychodynamic psychotherapy/ or rational emotive behavior therapy/ or reality therapy/ or relationship therapy/ or solution focused therapy/ or supportive psychotherapy/ or transactional analysis/ or exp behavior therapy/ or exp exposure therapy/ or exp aversion therapy/ or exp humanistic psychotherapy/ or exp hypnotherapy/ or exp psychoanalysis/ or psychotherapeutic counseling/ or behavior modification/ or biofeedback training/ or exp contingency management/ or "fading (conditioning)"/ or exp self management/ or bibliotherapy/ or computer assisted therapy/ or movement therapy/ or multimodal treatment approach/ or online therapy/ or partial hospitalization/ or personal therapy/ or sex therapy/ or exp cognitive techniques/ or exp creative arts therapy/ or exp cross cultural treatment/ or outpatient treatment/ or animal assisted therapy/ or mirroring/ or morita therapy/ or motivational interviewing/ or mutual storytelling technique/ or paradoxical techniques/ or exp relaxation therapy/</p> <p><i>(see Medline term list of text words referring to psychological interventions)</i></p> |
|--------------|--------------------------------------------------------------------------------------------------------------------------------------------------------------------------------------------------------------------------------------------------------------------------------------------------------------------------------------------------------------------------------------------------------------------------------------------------------------------------------------------------------------------------------------------------------------------------------------------------------------------------------------------------------------------------------------------------------------------------------------------------------------------------------------------------------------------------------------------------------------------------------------------------------------------------------------------------------------------------------------------------------------------------------------------------------------------------------------------------------------------------------------------------------------------------------------------------------------------------------------------------------------------------------------------------------------------------------------------------------------------------------------------------------------------------------------------------------------------------------------------------------------------------------------------------------------------------------------------------------------------------------------------------------------------------------------------------------------------------------------------------------------------------------------------------------------------------------------------------------|

**CENTRAL**

|              |                                                                                                                                                                                                                                                                                                                                                                                                                                                                                                                                                                                                                                                                                                                                                                                                                                                                                                                                                                                                                                                                                                                                                                                                                                                                                                                                                                                                                                                                                                                                                                                                                                                                                                                                                                                                                                                                                                                                                                                                                                                                                                                                                                                                                                                                                                                                                                                                                                                                                                                                                                                                                                                                                                                                                                                                                                                                                                                                                                                                                                                                                                                                                                                                                                                                                                                                                                                                                                                                                                                                                                                                                                                                                                                                                                                                                                                                                                 |
|--------------|-------------------------------------------------------------------------------------------------------------------------------------------------------------------------------------------------------------------------------------------------------------------------------------------------------------------------------------------------------------------------------------------------------------------------------------------------------------------------------------------------------------------------------------------------------------------------------------------------------------------------------------------------------------------------------------------------------------------------------------------------------------------------------------------------------------------------------------------------------------------------------------------------------------------------------------------------------------------------------------------------------------------------------------------------------------------------------------------------------------------------------------------------------------------------------------------------------------------------------------------------------------------------------------------------------------------------------------------------------------------------------------------------------------------------------------------------------------------------------------------------------------------------------------------------------------------------------------------------------------------------------------------------------------------------------------------------------------------------------------------------------------------------------------------------------------------------------------------------------------------------------------------------------------------------------------------------------------------------------------------------------------------------------------------------------------------------------------------------------------------------------------------------------------------------------------------------------------------------------------------------------------------------------------------------------------------------------------------------------------------------------------------------------------------------------------------------------------------------------------------------------------------------------------------------------------------------------------------------------------------------------------------------------------------------------------------------------------------------------------------------------------------------------------------------------------------------------------------------------------------------------------------------------------------------------------------------------------------------------------------------------------------------------------------------------------------------------------------------------------------------------------------------------------------------------------------------------------------------------------------------------------------------------------------------------------------------------------------------------------------------------------------------------------------------------------------------------------------------------------------------------------------------------------------------------------------------------------------------------------------------------------------------------------------------------------------------------------------------------------------------------------------------------------------------------------------------------------------------------------------------------------------------|
| Diagnosis    | <p>Stress, Psychological (Explode Tree 1) OR Anxiety Disorders (Explode all trees)</p> <p>(trauma* NEAR3 stress) OR (stress NEAR3 disorder*) OR PTSD</p>                                                                                                                                                                                                                                                                                                                                                                                                                                                                                                                                                                                                                                                                                                                                                                                                                                                                                                                                                                                                                                                                                                                                                                                                                                                                                                                                                                                                                                                                                                                                                                                                                                                                                                                                                                                                                                                                                                                                                                                                                                                                                                                                                                                                                                                                                                                                                                                                                                                                                                                                                                                                                                                                                                                                                                                                                                                                                                                                                                                                                                                                                                                                                                                                                                                                                                                                                                                                                                                                                                                                                                                                                                                                                                                                        |
| Design       | -                                                                                                                                                                                                                                                                                                                                                                                                                                                                                                                                                                                                                                                                                                                                                                                                                                                                                                                                                                                                                                                                                                                                                                                                                                                                                                                                                                                                                                                                                                                                                                                                                                                                                                                                                                                                                                                                                                                                                                                                                                                                                                                                                                                                                                                                                                                                                                                                                                                                                                                                                                                                                                                                                                                                                                                                                                                                                                                                                                                                                                                                                                                                                                                                                                                                                                                                                                                                                                                                                                                                                                                                                                                                                                                                                                                                                                                                                               |
| Intervention | <p>Psychotherapy (explode all trees)</p> <p>Psychotherap* or intervention* or (Centered NEAR5 treatment*) or (Centered NEAR5 therapy) or (Centered NEAR5 therapies) or (based NEAR5 treatment*) or (based NEAR5 therapy) or (based NEAR5 therapies) or (acceptance NEAR5 treatment*) or (acceptance NEAR5 therapy) or (acceptance NEAR5 therapies) or (attachment NEAR5 treatment*) or (attachment NEAR5 therapy) or (attachment NEAR5 therapies) or (behavior* NEAR5 treatment*) or (behavior* NEAR5 therapy) or (behavior* NEAR5 therapies) or (analytic* NEAR5 treatment*) or (analytic* NEAR5 therapy) or (analytic* NEAR5 therapies) or (brief NEAR5 treatment*) or (brief NEAR5 therapy) or (brief NEAR5 therapies) or (person NEAR5 treatment*) or (person NEAR5 therapy) or (person NEAR5 therapies) or (cognitive NEAR5 treatment*) or (cognitive NEAR5 therapy) or (cognitive NEAR5 therapies) or (dynamic NEAR5 treatment*) or (dynamic NEAR5 therapy) or (dynamic NEAR5 therapies) or (energetic NEAR5 treatment*) or (energetic NEAR5 therapy) or (energetic NEAR5 therapies) or (coherence NEAR5 treatment*) or (coherence NEAR5 therapy) or (coherence NEAR5 therapies) or (collaborative NEAR5 treatment*) or (collaborative NEAR5 therapy) or (collaborative NEAR5 therapies) or (contemplative NEAR5 treatment*) or (contemplative NEAR5 therapy) or (contemplative NEAR5 therapies) or (dasein* NEAR5 treatment*) or (dasein* NEAR5 therapy) or (dasein* NEAR5 therapies) or (drama* NEAR5 treatment*) or (drama* NEAR5 therapy) or (drama* NEAR5 therapies) or (emotion* NEAR5 treatment*) or (emotion* NEAR5 therapy) or (emotion* NEAR5 therapies) or (feminist NEAR5 treatment*) or (feminist NEAR5 therapy) or (feminist NEAR5 therapies) or (sensiti?ation NEAR5 treatment*) or (sensiti?ation NEAR5 therapy) or (sensiti?ation NEAR5 therapies) or (existen* NEAR5 treatment*) or (existen* NEAR5 therapy) or (existen* NEAR5 therapies) or (exposure NEAR5 treatment*) or (exposure NEAR5 therapy) or (exposure NEAR5 therapies) or (gestalt NEAR5 treatment*) or (gestalt NEAR5 therapy) or (gestalt NEAR5 therapies) or (holistic NEAR5 treatment*) or (holistic NEAR5 therapy) or (holistic NEAR5 therapies) or (humanistic NEAR5 treatment*) or (humanistic NEAR5 therapy) or (humanistic NEAR5 therapies) or (hypno* NEAR5 treatment*) or (hypno* NEAR5 therapy) or (hypno* NEAR5 therapies) or (integr* NEAR5 treatment*) or (integr* NEAR5 therapy) or (integr* NEAR5 therapies) or (short-term* NEAR5 treatment*) or (short-term* NEAR5 therapy) or (short-term* NEAR5 therapies) or (interpersonal* NEAR5 treatment*) or (interpersonal* NEAR5 therapy) or (interpersonal* NEAR5 therapies) or (logo* NEAR5 treatment*) or (logo* NEAR5 therapy) or (logo* NEAR5 therapies) or (mindfulness* NEAR5 treatment*) or (mindfulness* NEAR5 therapy) or (mindfulness* NEAR5 therapies) or (multimodal NEAR5 treatment*) or (multimodal NEAR5 therapy) or (multimodal NEAR5 therapies) or (narrative NEAR5 treatment*) or (narrative NEAR5 therapy) or (narrative NEAR5 therapies) or (positive NEAR5 treatment*) or (positive NEAR5 therapy) or (positive NEAR5 therapies) or (provocative NEAR5 treatment*) or (provocative NEAR5 therapy) or (provocative NEAR5 therapies) or (short-term NEAR5 treatment*) or (short-term NEAR5 therapy) or (short-term NEAR5 therapies) or (psychol* NEAR5 treatment*) or (psychol* NEAR5 therapy) or (psychol* NEAR5 therapies) or (oriented NEAR5 treatment*) or (oriented NEAR5 therapy) or (oriented NEAR5 therapies) or (rational* NEAR5 treatment*) or (rational* NEAR5 therapy) or (rational* NEAR5 therapies) or (reality NEAR5 treatment*) or (reality NEAR5 therapy) or (reality NEAR5 therapies) or (solution* NEAR5 treatment*) or (solution* NEAR5 therapy) or (solution* NEAR5 therapies) or (system* NEAR5</p> |

|  |                                                                                                                                                                                                                                                                                                                                                                                                                                                                                                                                                                                                                                                                                                                                                                                                                                                                                                                                                                                                                                                                                                                                                                                                                                                                                                                                                                                                                                                                                                                                                                                                                                                                                                                                                                                                                                                                                                                                                                                                                                                                                                                                                                                                                                                                                                                                              |
|--|----------------------------------------------------------------------------------------------------------------------------------------------------------------------------------------------------------------------------------------------------------------------------------------------------------------------------------------------------------------------------------------------------------------------------------------------------------------------------------------------------------------------------------------------------------------------------------------------------------------------------------------------------------------------------------------------------------------------------------------------------------------------------------------------------------------------------------------------------------------------------------------------------------------------------------------------------------------------------------------------------------------------------------------------------------------------------------------------------------------------------------------------------------------------------------------------------------------------------------------------------------------------------------------------------------------------------------------------------------------------------------------------------------------------------------------------------------------------------------------------------------------------------------------------------------------------------------------------------------------------------------------------------------------------------------------------------------------------------------------------------------------------------------------------------------------------------------------------------------------------------------------------------------------------------------------------------------------------------------------------------------------------------------------------------------------------------------------------------------------------------------------------------------------------------------------------------------------------------------------------------------------------------------------------------------------------------------------------|
|  | treatment*) or (system* NEAR5 therapy) or (system* NEAR5 therapies) or (transactional* NEAR5 treatment*) or (transactional* NEAR5 therapy) or (transactional* NEAR5 therapies) or (transpersonal NEAR5 treatment*) or (transpersonal NEAR5 therapy) or (transpersonal NEAR5 therapies) or (eclectic* NEAR5 treatment*) or (eclectic* NEAR5 therapy) or (eclectic* NEAR5 therapies) or (experiential* NEAR5 treatment*) or (experiential* NEAR5 therapy) or (experiential* NEAR5 therapies) or (expressive* NEAR5 treatment*) or (expressive* NEAR5 therapy) or (expressive* NEAR5 therapies) or (individual NEAR5 treatment*) or (individual NEAR5 therapy) or (individual NEAR5 therapies) or (insight* NEAR5 treatment*) or (insight* NEAR5 therapy) or (insight* NEAR5 therapies) or (persuasion NEAR5 treatment*) or (persuasion NEAR5 therapy) or (persuasion NEAR5 therapies) or (relationship NEAR5 treatment*) or (relationship NEAR5 therapy) or (relationship NEAR5 therapies) or (supportive* NEAR5 treatment*) or (supportive* NEAR5 therapy) or (supportive* NEAR5 therapies) or (implosive NEAR5 treatment*) or (implosive NEAR5 therapy) or (implosive NEAR5 therapies) or (inhibition NEAR5 treatment*) or (inhibition NEAR5 therapy) or (inhibition NEAR5 therapies) or (aversion NEAR5 treatment*) or (aversion NEAR5 therapy) or (aversion NEAR5 therapies) or (focused NEAR5 treatment*) or (focused NEAR5 therapy) or (focused NEAR5 therapies) or (shortterm* NEAR5 treatment*) or (shortterm* NEAR5 therapy) or (shortterm* NEAR5 therapies) or (long-term* NEAR5 treatment*) or (long-term* NEAR5 therapy) or (long-term* NEAR5 therapies) or (longterm* NEAR5 treatment*) or (longterm* NEAR5 therapy) or (longterm* NEAR5 therapies) or (inter-personal* NEAR5 treatment*) or (inter-personal* NEAR5 therapy) or (inter-personal* NEAR5 therapies) or (multi-modal NEAR5 treatment*) or (multi-modal NEAR5 therapy) or (multi-modal NEAR5 therapies) or (relaxation NEAR5 treatment*) or (relaxation NEAR5 therapy) or (relaxation NEAR5 therapies) or (talk NEAR5 treatment*) or (talk NEAR5 therapy) or (talk NEAR5 therapies) or (confront* NEAR5 treatment*) or (confront* NEAR5 therapy) or (confront* NEAR5 therapies) or (schema* NEAR5 treatment*) or (schema* NEAR5 therapy) or (schema* NEAR5 therapies) |
|--|----------------------------------------------------------------------------------------------------------------------------------------------------------------------------------------------------------------------------------------------------------------------------------------------------------------------------------------------------------------------------------------------------------------------------------------------------------------------------------------------------------------------------------------------------------------------------------------------------------------------------------------------------------------------------------------------------------------------------------------------------------------------------------------------------------------------------------------------------------------------------------------------------------------------------------------------------------------------------------------------------------------------------------------------------------------------------------------------------------------------------------------------------------------------------------------------------------------------------------------------------------------------------------------------------------------------------------------------------------------------------------------------------------------------------------------------------------------------------------------------------------------------------------------------------------------------------------------------------------------------------------------------------------------------------------------------------------------------------------------------------------------------------------------------------------------------------------------------------------------------------------------------------------------------------------------------------------------------------------------------------------------------------------------------------------------------------------------------------------------------------------------------------------------------------------------------------------------------------------------------------------------------------------------------------------------------------------------------|

**Psyndex (Ovid)**

|              |                                                                                                                                                                                                                                                                                                                                                                                                                                                                                                                                                                                                                                                                                                                                                                                                                                                                                                                                                                                                                                                                                                                                                                                                                                                                                                                                                                                                                                                                                                                 |
|--------------|-----------------------------------------------------------------------------------------------------------------------------------------------------------------------------------------------------------------------------------------------------------------------------------------------------------------------------------------------------------------------------------------------------------------------------------------------------------------------------------------------------------------------------------------------------------------------------------------------------------------------------------------------------------------------------------------------------------------------------------------------------------------------------------------------------------------------------------------------------------------------------------------------------------------------------------------------------------------------------------------------------------------------------------------------------------------------------------------------------------------------------------------------------------------------------------------------------------------------------------------------------------------------------------------------------------------------------------------------------------------------------------------------------------------------------------------------------------------------------------------------------------------|
| Diagnosis    | posttraumatic stress disorder/ OR emotional trauma/ OR stress reactions/ OR traumatic neurosis/                                                                                                                                                                                                                                                                                                                                                                                                                                                                                                                                                                                                                                                                                                                                                                                                                                                                                                                                                                                                                                                                                                                                                                                                                                                                                                                                                                                                                 |
|              | ((trauma* adj3 stress) or (trauma* adj3 belastung*) or (stress adj3 stoerung*) or (Belastung* adj3 stoerung*) or belastungsstoerung* or PTSD or PTB or PTBS).tw.                                                                                                                                                                                                                                                                                                                                                                                                                                                                                                                                                                                                                                                                                                                                                                                                                                                                                                                                                                                                                                                                                                                                                                                                                                                                                                                                                |
| Design       | (random* or zufa?!* or placebo* or zuweis*).mp. or (kontrol* or kompar* or relativ* or vergleich* or ((klin* or evaluat* or prospektiv*) adj3 (trial* or studi* or untersuch*))).tw. or exp treatment effectiveness evaluation/ or exp experimental design/ or versus.id. or vs.id.                                                                                                                                                                                                                                                                                                                                                                                                                                                                                                                                                                                                                                                                                                                                                                                                                                                                                                                                                                                                                                                                                                                                                                                                                             |
| Intervention | psychotherapy/ or adlerian psychotherapy/ or adolescent psychotherapy/ or analytical psychotherapy/ or autogenic training/ or brief psychotherapy/ or client centered therapy/ or cognitive behavior therapy/ or eclectic psychotherapy/ or emotion focused therapy/ or existential therapy/ or experiential psychotherapy/ or expressive psychotherapy/ or eye movement desensitization therapy/ or feminist therapy/ or geriatric psychotherapy/ or gestalt therapy/ or guided imagery/ or individual psychotherapy/ or insight therapy/ or integrative psychotherapy/ or interpersonal psychotherapy/ or logotherapy/ or narrative therapy/ or persuasion therapy/ or primal therapy/ or psychodrama/ or psychodynamic psychotherapy/ or rational emotive behavior therapy/ or reality therapy/ or relationship therapy/ or solution focused therapy/ or supportive psychotherapy/ or transactional analysis/ or exp behavior therapy/ or implosive therapy/ or reciprocal inhibition therapy/ or "response cost"/ or systematic desensitization therapy/ or exp aversion therapy/ or covert sensitization/ or exp exposure therapy/ or implosive therapy/ or systematic desensitization therapy/ or exp humanistic psychotherapy/ or existential therapy/ or gestalt therapy/ or humanism/ or exp humanistic psychology/ or transpersonal psychology/ or exp hypnotherapy/ or "age regression (hypnotic)"/ or exp psychoanalysis/ or dream analysis/ or self analysis/ or exp psychotherapeutic counseling/ |
|              | (Psychotherap* or Intervention* or (Zentriert* or Basiert* or Fundiert* or Fokussiert* or Akzeptanz or Bindung* or Verhalten* or Behavior?r* or Analytisch* or Kurz* or Person* or Kognitiv* or Dynamisch* or Energetisch* or Kohaerenz or Kollaborativ* or Kontemplativ* or dasein* or drama* or emotion* or Feministisch* or Sensibilisierung* or existen* or Exposition* or Gestalt* or Holistisch* or Ganzheitlich* or Humanistisch* or hypno* or Integr* or Kurzzeit* or Langzeit* or interpersonal* or logo* or Achtsamkeit* or mindfulness* or Multimodal* or Narrativ* or Positiv* or Provokativ* or Orientiert* or psychol* or rational* or Realitaet* or Loesung* or system* or Transaktion* or Transpersonal* or eklektisch* or Empirisch* or Expressiv* or Individu?!* or einzel* or Einsicht* or Ueberzeugung* or Beziehung* or Supportiv* or Unterstuetz* or Implosiv* or Inhibition* or Hemm* or Aversion* or Abneig* or Konfront* or Schema* or Relaxation* or Entspannung* or Gesprach*) adj5 (Behandlung* or Therapie or Therapien)).tw                                                                                                                                                                                                                                                                                                                                                                                                                                                       |

## **eAppendix 2. Addition to Methods**

### **Selection criteria: Definition of psychotherapeutic treatments**

Psychotherapeutic PTSD treatments had to be implemented at the level of individual patients, rather than in group, family, or couple therapy; they had to include face-to-face contact between the patient and the therapist, as opposed to telephone or internet-based interactions between patient and therapist; they had to be standardized (similar dose of treatment for all patients and treatment based on the same rationale for all patients in one study); they had to consist primarily of verbal communication; and they had to directly address the trauma or subsequent PTSD symptoms. Pharmacological treatments needed to contain any pharmacological agent that was assumed to lead to a reduction in PTSD symptom severity.

### **Risk of Bias in the Included Studies**

To evaluate the quality of studies and potential risk of bias (RoB), we related to the predefined criteria in the “Cochrane Handbook for Systematic Reviews of Interventions”.<sup>1</sup> For the application of the RoB criteria in the context of psychotherapy research, we adhered to the recommendations by Munder & Barth.<sup>2</sup> For the combination of the individual RoB categories to one overall RoB rating we used the recommendations by Guyatt et al. .<sup>3</sup>

For each included study the risk for five potential bias categories was assessed: 1<sup>st</sup> *selection bias (sequence generation and allocation sequence concealment)*, 2<sup>nd</sup> *performance bias*, 3<sup>rd</sup> *detection bias*, 4<sup>th</sup> *attrition bias* and 5<sup>th</sup> *reporting bias*.

1<sup>st</sup> we rated “low” risk of *selection bias*, if both relevant categories (*sequence generation* and *concealment of allocation*) were considered as “low”. Risk for *selection bias* was considered “unclear” if at least one of the two categories were considered “unclear”, and risk for *selection bias* was considered “high”, if both categories were considered “high”. *Sequence generation* was considered adequate, if participants were randomly assigned to treatment conditions stating a randomization procedure that ensured that similarity of groups at baseline was warranted (e.g., computerized random sequence generation). *Concealment of allocation* was considered adequate if the procedures described ensured that the investigators responsible for patient selection did not suspect which treatment was next before allocation (e.g., if allocation to treatments was conducted by an external third party).

2<sup>nd</sup> risk of performance bias was rated “high”, if participants as well as assessors were not blinded and knew which therapy the participant received and if the treatments differed with respect to their credibility. Risk of performance bias was considered “low” if two equally credible treatments were compared, even if participants and treatment providers were not blinded.

3<sup>rd</sup> risk of detection bias was rated “high” if outcome assessors knew which therapy a participant was assigned to. Risk of *detection bias* was considered “low” if only self-rated outcome measures were used.<sup>2</sup>

4<sup>th</sup> risk of *attrition bias* was considered “high” if missing outcome data varied largely across conditions and analyses were not conducted according to the intention to treat (ITT) principle.

Risk of *attrition bias* was considered “low” if all participants were analysed as randomized.

5th risk of *reporting bias* was considered “high”, if outcome reporting did not include all predefined outcomes or data for effect size generation was insufficient. If relevant information on any quality criterion were not reported, or if the reported information was insufficient for a clear “high” or “low” rating we coded the respective criterion as “unclear”.

We rated a study as “high” regarding overall RoB, if three or more of the five criteria were rated with “high” RoB. We rated a study as “low” regarding overall RoB, if at least four criteria were rated “low”, and maximum one criterion was rated “unclear”. In any other case, we rated the study as having a “moderate” RoB.

### **Indirectness**

We rated the indirectness of the available evidence as recommended by Guyatt et al. .<sup>4</sup> We assessed whether 1<sup>st</sup> a study differed from the studies of interest with respect to 1<sup>st</sup> the relevant study population, 2<sup>nd</sup> the applied intervention, 3<sup>rd</sup> the evaluated outcomes, and 4<sup>th</sup> whether a study provided direct evidence for at least one of the comparisons of interest.

Overall indirectness was considered “low,” if at least 3 items were rated as “low” and maximum one item was rated “unclear”. Overall indirectness was considered “high” if at least two items were rated as “high”. All other combinations were rated “moderate”.

### **Confidence in Network Meta-analysis (CINEMA)**

We assessed the quality of the entire network using the CINEMA framework.<sup>5</sup> This includes evaluations of within study bias, across study bias, indirectness, imprecision, heterogeneity and incoherence. The RoB rating was used for evaluating within study bias. For across study bias we assumed that the likelihood of unpublished data was small because of the rather complex study designs with a high effort in implementing at least two active treatments. For the evaluation of indirectness, we used the rating as described above. For the evaluation of imprecision, heterogeneity and incoherence we defined the clinically important effect size as 0.6.<sup>6</sup>

1. Higgins JPT, Green S. Cochrane Handbook for Systematic Reviews of Interventions. Version 5.1.0 ed: The Cochrane Collaboration; updated March 2011: <http://www.cochrane-handbook.org>.
2. Munder T, Barth J. Cochrane’s risk of bias tool in the context of psychotherapy outcome research. *Psychotherapy Research*. 2018;28(3):347-355.
3. Guyatt GH, Oxman AD, Vist G, et al. GRADE guidelines: 4. Rating the quality of evidence—study limitations (risk of bias). *J Clin Epidemiol*. 2011;64(4):407-415.
4. Guyatt GH, Oxman AD, Kunz R, et al. GRADE guidelines: 8. Rating the quality of evidence—indirectness. *J Clin Epidemiol*. 2011;64(12):1303-1310.
5. Salanti G, Del Giovane C, Chaimani A, Caldwell DM, Higgins JP. Evaluating the quality of evidence from a network meta-analysis. *PLoS One*. 2014;9(7):e99682.
6. Stefanovics EA, Rosenheck RA, Jones KM, Huang G, Krystal JH. Minimal clinically important differences (MCID) in assessing outcomes of post-traumatic stress disorder. *Psychiatr Q*. 2018;89(1):141-155.

### eAppendix 3. Additional Results (Main Analyses)

```
#####
> ## -----POST-----
> postlong <- read_excel("postlong.xlsx")
> #View(postlong)
> #str(postlong)
>
> p1 <- pairwise(treat = t, n = posn, mean = posm, sd = possd, data=postlong, studlab=id, sm="SMD")
> #View(p1)
>
> ## -----
> # Conduct network meta-analysis
>
> net1 <- netmeta(p1, sm = "SMD", comb.fixed = FALSE, comb.random = TRUE)
> net1
Original data (with adjusted standard errors for multi-arm studies):
```

|        | treat1 | treat2 | TE      | seTE   | seTE.adj | narms | multiarm |
|--------|--------|--------|---------|--------|----------|-------|----------|
| MA2    | PTMed  | PTPla  | 0.1986  | 0.4285 | 0.4285   | 2     |          |
| ps2889 | Med    | PTMed  | -0.1397 | 0.4479 | 0.4479   | 2     |          |
| ps3283 | Med    | PT     | 0.0902  | 0.5003 | 0.5003   | 2     |          |
| ps3643 | Med    | PTMed  | 0.3768  | 0.2507 | 0.2507   | 2     |          |
| ps3804 | Med    | Pla    | -0.0388 | 0.2604 | 0.3152   | 3     | *        |
| ps3804 | Med    | PT     | 0.4458  | 0.2639 | 0.3233   | 3     | *        |
| ps3804 | Pla    | PT     | 0.4844  | 0.2667 | 0.3306   | 3     | *        |
| TR1110 | PTMed  | PTPla  | -1.6776 | 0.5440 | 0.5440   | 2     |          |
| TR1127 | PTMed  | PTPla  | -0.8525 | 0.6481 | 0.6481   | 2     |          |
| TR1207 | PTMed  | PTPla  | -0.5206 | 0.4000 | 0.4000   | 2     |          |
| TR1246 | PTMed  | PTPla  | -0.1925 | 0.2865 | 0.2865   | 2     |          |
| TR1296 | Med    | PT     | 0.0127  | 0.2060 | 0.2324   | 3     | *        |
| TR1296 | Med    | PTMed  | 0.2180  | 0.2436 | 0.3947   | 3     | *        |
| TR1296 | PT     | PTMed  | 0.2066  | 0.1868 | 0.2045   | 3     | *        |
| TR1355 | Med    | PT     | -0.1571 | 0.1883 | 0.2600   | 4     | *        |
| TR1355 | Med    | PTMed  | 0.0000  | 0.1852 | 0.2521   | 4     | *        |
| TR1355 | Med    | WL     | 0.0000  | 0.1923 | 0.2698   | 4     | *        |
| TR1355 | PT     | PTMed  | 0.1570  | 0.1937 | 0.2761   | 4     | *        |
| TR1355 | PT     | WL     | 0.1569  | 0.2005 | 0.2957   | 4     | *        |

|        |       |       |         |        |        |   |   |
|--------|-------|-------|---------|--------|--------|---|---|
| TR1355 | PTMed | WL    | 0.0000  | 0.1975 | 0.2865 | 4 | * |
| trials | Med   | PTMed | -0.0610 | 0.1691 | 0.2047 | 3 | * |
| trials | Med   | PTPla | -0.3736 | 0.1718 | 0.2112 | 3 | * |
| trials | PTMed | PTPla | -0.3126 | 0.1726 | 0.2131 | 3 | * |

Number of treatment arms (by study):

|        | narms |
|--------|-------|
| MA2    | 2     |
| ps2889 | 2     |
| ps3283 | 2     |
| ps3643 | 2     |
| ps3804 | 3     |
| TR1110 | 2     |
| TR1127 | 2     |
| TR1207 | 2     |
| TR1246 | 2     |
| TR1296 | 3     |
| TR1355 | 4     |
| trials | 3     |

Results (random effects model):

|        | treat1 | treat2 | SMD     | 95%-CI             |
|--------|--------|--------|---------|--------------------|
| MA2    | PTMed  | PTPla  | -0.4146 | [-0.6874; -0.1418] |
| ps2889 | Med    | PTMed  | 0.1169  | [-0.1058; 0.3397]  |
| ps3283 | Med    | PT     | 0.0272  | [-0.2289; 0.2833]  |
| ps3643 | Med    | PTMed  | 0.1169  | [-0.1058; 0.3397]  |
| ps3804 | Med    | Pla    | -0.2401 | [-0.7559; 0.2757]  |
| ps3804 | Med    | PT     | 0.0272  | [-0.2289; 0.2833]  |
| ps3804 | Pla    | PT     | 0.2673  | [-0.2509; 0.7855]  |
| TR1110 | PTMed  | PTPla  | -0.4146 | [-0.6874; -0.1418] |
| TR1127 | PTMed  | PTPla  | -0.4146 | [-0.6874; -0.1418] |
| TR1207 | PTMed  | PTPla  | -0.4146 | [-0.6874; -0.1418] |
| TR1246 | PTMed  | PTPla  | -0.4146 | [-0.6874; -0.1418] |
| TR1296 | Med    | PT     | 0.0272  | [-0.2289; 0.2833]  |
| TR1296 | Med    | PTMed  | 0.1169  | [-0.1058; 0.3397]  |
| TR1296 | PT     | PTMed  | 0.0897  | [-0.1853; 0.3647]  |
| TR1355 | Med    | PT     | 0.0272  | [-0.2289; 0.2833]  |
| TR1355 | Med    | PTMed  | 0.1169  | [-0.1058; 0.3397]  |
| TR1355 | Med    | WL     | 0.0965  | [-0.3086; 0.5016]  |



```

TR1355      PT  PTMed  0.0897 [-0.1853;  0.3647]
TR1355      PT      WL  0.0693 [-0.3495;  0.4880]
TR1355      PTMed  WL -0.0204 [-0.4311;  0.3902]
trials      Med  PTMed  0.1169 [-0.1058;  0.3397]
trials      Med  PTPla -0.2977 [-0.6111;  0.0158]
trials      PTMed PTPla -0.4146 [-0.6874; -0.1418]

```

```

Number of studies: k = 12
Number of treatments: n = 6
Number of pairwise comparisons: m = 23
Number of designs: d = 7

```

Random effects model

Treatment estimate (sm = 'SMD'):

|       | Med     | Pla     | PT      | PTMed  | PTPla   | WL      |
|-------|---------|---------|---------|--------|---------|---------|
| Med   | .       | -0.2401 | 0.0272  | 0.1169 | -0.2977 | 0.0965  |
| Pla   | 0.2401  | .       | 0.2673  | 0.3570 | -0.0576 | 0.3366  |
| PT    | -0.0272 | -0.2673 | .       | 0.0897 | -0.3249 | 0.0693  |
| PTMed | -0.1169 | -0.3570 | -0.0897 | .      | -0.4146 | -0.0204 |
| PTPla | 0.2977  | 0.0576  | 0.3249  | 0.4146 | .       | 0.3942  |
| WL    | -0.0965 | -0.3366 | -0.0693 | 0.0204 | -0.3942 | .       |

Lower 95%-confidence limit:

|       | Med     | Pla     | PT      | PTMed   | PTPla   | WL      |
|-------|---------|---------|---------|---------|---------|---------|
| Med   | .       | -0.7559 | -0.2289 | -0.1058 | -0.6111 | -0.3086 |
| Pla   | -0.2757 | .       | -0.2509 | -0.1876 | -0.6494 | -0.2991 |
| PT    | -0.2833 | -0.7855 | .       | -0.1853 | -0.6917 | -0.3495 |
| PTMed | -0.3397 | -0.9017 | -0.3647 | .       | -0.6874 | -0.4311 |
| PTPla | -0.0158 | -0.5342 | -0.0419 | 0.1418  | .       | -0.0843 |
| WL    | -0.5016 | -0.9722 | -0.4880 | -0.3902 | -0.8727 | .       |

Upper 95%-confidence limit:

|       | Med    | Pla    | PT     | PTMed  | PTPla   | WL     |
|-------|--------|--------|--------|--------|---------|--------|
| Med   | .      | 0.2757 | 0.2833 | 0.3397 | 0.0158  | 0.5016 |
| Pla   | 0.7559 | .      | 0.7855 | 0.9017 | 0.5342  | 0.9722 |
| PT    | 0.2289 | 0.2509 | .      | 0.3647 | 0.0419  | 0.4880 |
| PTMed | 0.1058 | 0.1876 | 0.1853 | .      | -0.1418 | 0.3902 |
| PTPla | 0.6111 | 0.6494 | 0.6917 | 0.6874 | .       | 0.8727 |
| WL    | 0.3086 | 0.2991 | 0.3495 | 0.4311 | 0.0843  | .      |

Quantifying heterogeneity / inconsistency:  
 $\tau^2 = 0.0177$ ;  $I^2 = 19.8\%$

Tests of heterogeneity (within designs) and inconsistency (between designs):

|                 | Q     | d.f. | p-value |
|-----------------|-------|------|---------|
| Total           | 14.96 | 12   | 0.2437  |
| Within designs  | 9.58  | 5    | 0.0881  |
| Between designs | 5.37  | 7    | 0.6145  |

> #forest(net1, ref = "Med")

>

>

> # Inconsistency

> net1\$d

[1] 7

>

> designsl = as.character(decomp.design(net1)\$Q.het.design\$design)

> designsl

[1] "Med:PT" "Med:PTMed" "PTMed:PTPla" "Med:Pla:PT" "Med:PT:PTMed" "Med:PT:PTMed:WL"  
 "Med:PTMed:PTPla"

>

> split1 = netsplit(net1)

> print(split1, showall = FALSE, digits = 2)

Random effects model:

| comparison  | k | prop | nma   | direct | indir. | Diff  | z     | p-value |
|-------------|---|------|-------|--------|--------|-------|-------|---------|
| Med:Pla     | 1 | 0.81 | -0.24 | -0.04  | -1.10  | 1.06  | 1.58  | 0.1143  |
| Med:PT      | 4 | 0.86 | 0.03  | 0.05   | -0.14  | 0.19  | 0.50  | 0.6143  |
| Med:PTMed   | 5 | 0.91 | 0.12  | 0.08   | 0.53   | -0.45 | -1.11 | 0.2663  |
| Med:PTPla   | 1 | 0.54 | -0.30 | -0.37  | -0.21  | -0.17 | -0.52 | 0.6055  |
| Med:WL      | 1 | 0.78 | 0.10  | 0.00   | 0.44   | -0.44 | -0.88 | 0.3767  |
| Pla:PT      | 1 | 0.79 | 0.27  | 0.48   | -0.54  | 1.02  | 1.58  | 0.1143  |
| PT:PTMed    | 2 | 0.73 | 0.09  | 0.18   | -0.16  | 0.34  | 1.09  | 0.2758  |
| PT:WL       | 1 | 0.79 | 0.07  | 0.16   | -0.26  | 0.42  | 0.79  | 0.4279  |
| PTMed:PTPla | 6 | 0.91 | -0.41 | -0.38  | -0.82  | 0.44  | 0.89  | 0.3725  |
| PTMed:WL    | 1 | 0.77 | -0.02 | 0.00   | -0.09  | 0.09  | 0.18  | 0.8566  |

Legend:

comparison - Treatment comparison

k - Number of studies providing direct evidence

```

prop      - Direct evidence proportion
nma       - Estimated treatment effect (SMD) in network meta-analysis
direct    - Estimated treatment effect (SMD) derived from direct evidence
indir.    - Estimated treatment effect (SMD) derived from indirect evidence
Diff      - Difference between direct and indirect treatment estimates
z         - z-value of test for disagreement (direct versus indirect)
p-value   - p-value of test for disagreement (direct versus indirect)

```

```

>
> decomp.design(net1)
Q statistics to assess homogeneity / consistency

```

|                 | Q     | df | p-value |
|-----------------|-------|----|---------|
| Total           | 14.95 | 12 | 0.2441  |
| Within designs  | 9.58  | 5  | 0.0881  |
| Between designs | 5.37  | 7  | 0.6145  |

Design-specific decomposition of within-designs Q statistic

| Design      | Q    | df | p-value |
|-------------|------|----|---------|
| Med:PTMed   | 1.01 | 1  | 0.3143  |
| PTMed:PTPla | 8.57 | 4  | 0.0729  |

Between-designs Q statistic after detaching of single designs

| Detached design | Q    | df | p-value |
|-----------------|------|----|---------|
| Med:PT          | 5.34 | 6  | 0.5006  |
| Med:PTMed       | 4.78 | 6  | 0.5726  |
| PTMed:PTPla     | 5.37 | 6  | 0.4976  |
| Med:Pla:PT      | 2.02 | 6  | 0.9176  |
| Med:PT:PTMed    | 4.81 | 5  | 0.4398  |
| Med:PT:PTMed:WL | 4.22 | 5  | 0.5175  |
| Med:PTMed:PTPla | 4.01 | 5  | 0.5478  |

Q statistic to assess consistency under the assumption of a full design-by-treatment interaction random effects model

|                 | Q    | df | p-value | tau.within | tau2.within |
|-----------------|------|----|---------|------------|-------------|
| Between designs | 1.26 | 7  | 0.9895  | 0.3951     | 0.1561      |

```

> #####
> ## -----FU-----
> fulong <- read_excel("fulong.xlsx")
> #View(fulong)
> #str(fulong)
>
> p3 <- pairwise(treat = t, n = fun, mean = fum, sd = fusc, data=fulong, studlab=id, sm="SMD")
> #View(p3)
>
> ## -----
> # Conduct network meta-analysis
>
> net3 <- netmeta(p3, sm = "SMD", comb.fixed = FALSE, comb.random = TRUE)
> net3

```

Original data (with adjusted standard errors for multi-arm studies):

|        | treat1 | treat2 | TE      | seTE   | seTE.adj | narms | multiarm |
|--------|--------|--------|---------|--------|----------|-------|----------|
| ps2889 | Med    | PTMed  | 1.9910  | 0.5687 | 0.5687   | 2     |          |
| ps3283 | Med    | PT     | 1.2915  | 0.6458 | 0.6458   | 2     |          |
| ps3804 | Med    | PT     | 0.8540  | 0.2967 | 0.2967   | 2     |          |
| TR1110 | PTMed  | PTPla  | -1.2729 | 0.5087 | 0.5087   | 2     |          |
| TR1246 | PTMed  | PTPla  | -0.3037 | 0.3070 | 0.3070   | 2     |          |
| TR1296 | Med    | PT     | 0.2646  | 0.2066 | 0.2336   | 3     | *        |
| TR1296 | Med    | PTMed  | 0.2045  | 0.2435 | 0.3931   | 3     | *        |
| TR1296 | PT     | PTMed  | -0.0589 | 0.1864 | 0.2041   | 3     | *        |

Number of treatment arms (by study):

|        | narms |
|--------|-------|
| ps2889 | 2     |
| ps3283 | 2     |
| ps3804 | 2     |
| TR1110 | 2     |
| TR1246 | 2     |
| TR1296 | 3     |

Results (random effects model):

|        | treat1 | treat2 | SMD    | 95%-CI            |
|--------|--------|--------|--------|-------------------|
| ps2889 | Med    | PTMed  | 0.9552 | [ 0.0408; 1.8696] |

```

ps3283   Med      PT  0.8300 [ 0.0748; 1.5851]
ps3804   Med      PT  0.8300 [ 0.0748; 1.5851]
TR1110   PTMed   PTPla -0.7094 [-1.6814; 0.2625]
TR1246   PTMed   PTPla -0.7094 [-1.6814; 0.2625]
TR1296   Med      PT  0.8300 [ 0.0748; 1.5851]
TR1296   Med   PTMed  0.9552 [ 0.0408; 1.8696]
TR1296   PT   PTMed  0.1252 [-0.8658; 1.1163]

```

```

Number of studies: k = 6
Number of treatments: n = 4
Number of pairwise comparisons: m = 8
Number of designs: d = 4

```

Random effects model

Treatment estimate (sm = 'SMD'):

|       | Med     | PT      | PTMed  | PTPla   |
|-------|---------|---------|--------|---------|
| Med   | .       | 0.8300  | 0.9552 | 0.2458  |
| PT    | -0.8300 | .       | 0.1252 | -0.5842 |
| PTMed | -0.9552 | -0.1252 | .      | -0.7094 |
| PTPla | -0.2458 | 0.5842  | 0.7094 | .       |

Lower 95%-confidence limit:

|       | Med     | PT      | PTMed   | PTPla   |
|-------|---------|---------|---------|---------|
| Med   | .       | 0.0748  | 0.0408  | -1.0887 |
| PT    | -1.5851 | .       | -0.8658 | -1.9723 |
| PTMed | -1.8696 | -1.1163 | .       | -1.6814 |
| PTPla | -1.5802 | -0.8039 | -0.2625 | .       |

Upper 95%-confidence limit:

|       | Med     | PT     | PTMed  | PTPla  |
|-------|---------|--------|--------|--------|
| Med   | .       | 1.5851 | 1.8696 | 1.5802 |
| PT    | -0.0748 | .      | 1.1163 | 0.8039 |
| PTMed | -0.0408 | 0.8658 | .      | 0.2625 |
| PTPla | 1.0887  | 1.9723 | 1.6814 | .      |

Quantifying heterogeneity / inconsistency:

$\tau^2 = 0.3287$ ;  $I^2 = 70.8\%$

Tests of heterogeneity (within designs) and inconsistency (between designs):

```

      Q d.f. p-value
Total      13.68   4 0.0084
Within designs  3.04   2 0.2188
Between designs 10.64   2 0.0049
> #forest(net3, ref = "Med")
>

```

**> # Inconsistency**

```

> net3$d
[1] 4
>
> designs3 = as.character(decomp.design(net3)$Q.het.design$design)
> designs3
[1] "Med:PT"      "Med:PTMed"   "PTMed:PTPla" "Med:PT:PTMed"
>
> split3 = netsplit(net3)
> print(split3, showall = FALSE, digits = 2)
Random effects model:

```

| comparison | k | prop | nma  | direct | indir. | Diff  | z     | p-value |
|------------|---|------|------|--------|--------|-------|-------|---------|
| Med:PT     | 3 | 0.95 | 0.83 | 0.70   | 3.61   | -2.91 | -1.57 | 0.1165  |
| Med:PTMed  | 2 | 0.89 | 0.96 | 0.87   | 1.67   | -0.80 | -0.53 | 0.5988  |
| PT:PTMed   | 1 | 0.70 | 0.13 | -0.06  | 0.56   | -0.62 | -0.56 | 0.5749  |

Legend:

```

comparison - Treatment comparison
k          - Number of studies providing direct evidence
prop       - Direct evidence proportion
nma        - Estimated treatment effect (SMD) in network meta-analysis
direct     - Estimated treatment effect (SMD) derived from direct evidence
indir.     - Estimated treatment effect (SMD) derived from indirect evidence
Diff       - Difference between direct and indirect treatment estimates
z          - z-value of test for disagreement (direct versus indirect)
p-value    - p-value of test for disagreement (direct versus indirect)

```

```

>
> decomp.design(net3)
Q statistics to assess homogeneity / consistency

```

```

      Q df p-value
Total      13.68   4 0.0084

```

Within designs 3.04 2 0.2188  
Between designs 10.64 2 0.0049

Design-specific decomposition of within-designs Q statistic

| Design      | Q    | df | p-value |
|-------------|------|----|---------|
| Med:PT      | 0.38 | 1  | 0.5381  |
| PTMed:PTPla | 2.66 | 1  | 0.1029  |

Between-designs Q statistic after detaching of single designs

| Detached design | Q    | df | p-value |
|-----------------|------|----|---------|
| Med:PT          | 8.34 | 1  | 0.0039  |
| Med:PTMed       | 3.84 | 1  | 0.0501  |
| Med:PT:PTMed    | 0.00 | 0  | --      |

Q statistic to assess consistency under the assumption of a full design-by-treatment interaction random effects model

|                 | Q    | df | p-value | tau.within | tau2.within |
|-----------------|------|----|---------|------------|-------------|
| Between designs | 6.04 | 2  | 0.0487  | 0.3286     | 0.1080      |

>

```
#####
> ## -----Drop-outs-----
> droplong <- read_excel("droplong.xlsx")
> #str(droplong)
>
> p5 <- pairwise(treat = t, event = d, n = nr,
+               data = droplong, studlab = id, allincr = TRUE, allstudies = TRUE, sm = "OR")
> #View(p5)
>

> net5 <- netmeta(p5, sm = "OR", comb.fixed = FALSE, comb.random = TRUE)
> summary(net5, digits = 2)
Number of studies: k = 12
Number of treatments: n = 6
Number of pairwise comparisons: m = 23
Number of designs: d = 7

Random effects model

Treatment estimate (sm = 'OR'):
      Med      PT  PTMed  PTPla   Pla   WL
Med      . 1.3452 0.5525 0.4637 1.7356 0.4086
PT      0.7434      . 0.4107 0.3447 1.2903 0.3038
PTMed 1.8099 2.4347      . 0.8392 3.1414 0.7396
PTPla 2.1567 2.9011 1.1916      . 3.7432 0.8813
Pla   0.5762 0.7750 0.3183 0.2672      . 0.2354
WL    2.4472 3.2920 1.3521 1.1347 4.2475      .

Lower 95%-confidence limit:
      Med      PT  PTMed  PTPla   Pla   WL
Med      . 0.6017 0.2649 0.1749 0.3051 0.1139
PT      0.3325      . 0.1685 0.1114 0.2286 0.0825
PTMed 0.8678 0.9988      . 0.3845 0.5028 0.2031
PTPla 0.8135 0.9373 0.5460      . 0.5322 0.2018
Pla   0.1013 0.1373 0.0510 0.0380      . 0.0292
WL    0.6821 0.8945 0.3712 0.2598 0.5276      .

Upper 95%-confidence limit:
      Med      PT  PTMed  PTPla   Pla   WL
Med      . 3.0073 1.1523 1.2293 9.8721 1.4660
PT      1.6619      . 1.0012 1.0669 7.2809 1.1179
PTMed 3.7749 5.9353      . 1.8316 19.6267 2.6938
PTPla 5.7175 8.9800 2.6006      . 26.3267 3.8491
```



```

Pla  3.2771  4.3735  1.9888  1.8789      . 1.8955
WL   8.7801 12.1153  4.9248  4.9562 34.1985      .

```

```

Quantifying heterogeneity / inconsistency:
tau^2 = 0.3962; I^2 = 52%

```

```

Tests of heterogeneity (within designs) and inconsistency (between designs):

```

```

      Q d.f. p-value
Total      25.02  12  0.0147
Within designs  3.12   5  0.6815
Between designs 21.90   7  0.0026

```

```

>
>

```

```

> # Inconsistency

```

```

> net5$d
[1] 7

```

```

>

```

```

> designs5 = as.character(decomp.design(net5)$Q.het.design$design)

```

```

> designs5

```

```

[1] "Med:PT"          "Med:PTMed"      "PTMed:PTPla"   "Med:PT:PTMed"  "Med:PT:PTMed:WL" "Med:PT:Pla"    "Med:PTMed:PTPla"

```

```

>

```

```

> split5 = netsplit(net5)

```

```

> print(split5, showall = FALSE, digits = 2)

```

```

Random effects model:

```

| comparison  | k | prop | nma  | direct | indir. | RoR   | z     | p-value |
|-------------|---|------|------|--------|--------|-------|-------|---------|
| Med:PT      | 4 | 0.91 | 1.35 | 1.59   | 0.24   | 6.73  | 1.32  | 0.1856  |
| Med:PTMed   | 5 | 0.90 | 0.55 | 0.61   | 0.22   | 2.73  | 0.80  | 0.4265  |
| Med:PTPla   | 1 | 0.45 | 0.46 | 0.27   | 0.73   | 0.37  | -1.01 | 0.3141  |
| Med:Pla     | 1 | 0.80 | 1.74 | 1.29   | 5.90   | 0.22  | -0.68 | 0.4946  |
| Med:WL      | 1 | 0.70 | 0.41 | 0.37   | 0.53   | 0.69  | -0.26 | 0.7913  |
| PT:PTMed    | 2 | 0.74 | 0.41 | 0.49   | 0.25   | 1.93  | 0.64  | 0.5249  |
| PT:Pla      | 1 | 0.83 | 1.29 | 1.70   | 0.34   | 4.93  | 0.68  | 0.4946  |
| PT:WL       | 1 | 0.77 | 0.30 | 0.53   | 0.05   | 11.05 | 1.52  | 0.1284  |
| PTMed:PTPla | 6 | 0.94 | 0.84 | 0.93   | 0.18   | 5.27  | 1.02  | 0.3075  |
| PTMed:WL    | 1 | 0.75 | 0.74 | 0.47   | 2.91   | 0.16  | -1.21 | 0.2278  |

```

Legend:

```

```

comparison - Treatment comparison

```

```

k           - Number of studies providing direct evidence

```

```

prop        - Direct evidence proportion

```

```

nma         - Estimated treatment effect (OR) in network meta-analysis

```

```

direct      - Estimated treatment effect (OR) derived from direct evidence

```

indir. - Estimated treatment effect (OR) derived from indirect evidence  
 RoR - Ratio of Ratios (direct versus indirect)  
 z - z-value of test for disagreement (direct versus indirect)  
 p-value - p-value of test for disagreement (direct versus indirect)

>  
 > decomp.design(net5)  
 Q statistics to assess homogeneity / consistency

|                 | Q     | df | p-value |
|-----------------|-------|----|---------|
| Total           | 25.02 | 12 | 0.0147  |
| Within designs  | 3.12  | 5  | 0.6815  |
| Between designs | 21.90 | 7  | 0.0026  |

Design-specific decomposition of within-designs Q statistic

| Design      | Q    | df | p-value |
|-------------|------|----|---------|
| Med:PTMed   | 0.76 | 1  | 0.3827  |
| PTMed:PTPla | 2.36 | 4  | 0.6702  |

Between-designs Q statistic after detaching of single designs

| Detached design | Q     | df | p-value |
|-----------------|-------|----|---------|
| Med:PT          | 21.84 | 6  | 0.0013  |
| Med:PTMed       | 21.31 | 6  | 0.0016  |
| PTMed:PTPla     | 21.19 | 6  | 0.0017  |
| Med:PT:PTMed    | 3.35  | 5  | 0.6468  |
| Med:PT:PTMed:WL | 11.65 | 5  | 0.0399  |
| Med:PT:Pla      | 20.27 | 6  | 0.0025  |
| Med:PTMed:PTPla | 17.45 | 5  | 0.0037  |

Q statistic to assess consistency under the assumption of a full design-by-treatment interaction random effects model

|                 | Q     | df | p-value | tau.within | tau2.within |
|-----------------|-------|----|---------|------------|-------------|
| Between designs | 21.90 | 7  | 0.0026  | 0          | 0           |

## eAppendix 4. Sensitivity Analyses

```
> ## -----POST Sensitivityanalysis-----  
> ## Simon excluded (SD imputed)  
> ## Mithoefer, Simon, Hien & Oehen excluded (indirectness = high)  
> ## Frommberger excluded (inadequate blinding: Reviewer Comment)  
> ## Simon, Schnieder, Rauch, Oehen, Buhman, Rothbaum excluded (reported only short-term data: Reviewer Comment)  
> ## Favoring self-rated outcomes  
  
> ## -----FU Sensitivityanalysis-----  
> ## Frommberger excluded (SD imputed & inadequate blinding)  
> ## Mithoefer excluded (indirectness = high)  
> ## Favoring self-rated outcomes
```

## eAppendix 5. Pairwise Meta-analyses

Comparative efficacy on PTSD symptom severity from pairwise meta-analyses at the end of treatment.

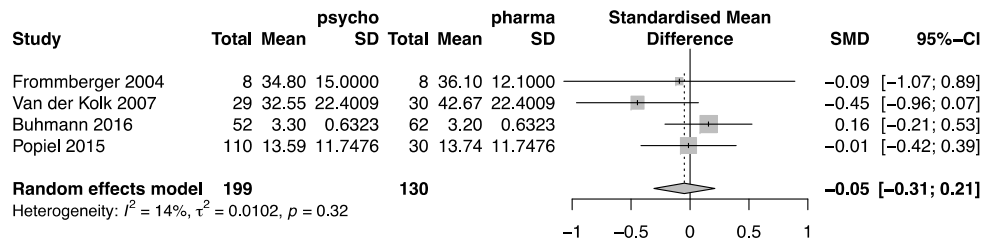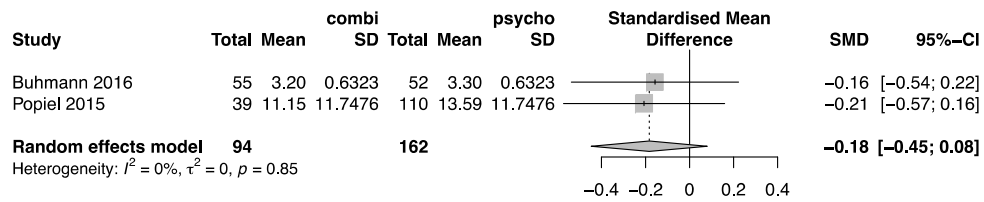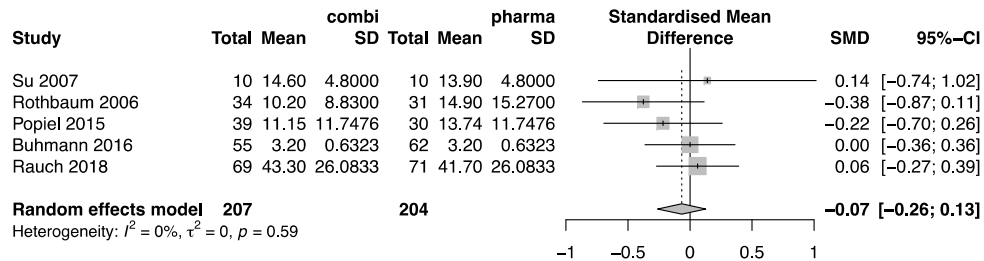

Comparative efficacy on PTSD symptom severity from pairwise meta-analyses at the last available follow-up.

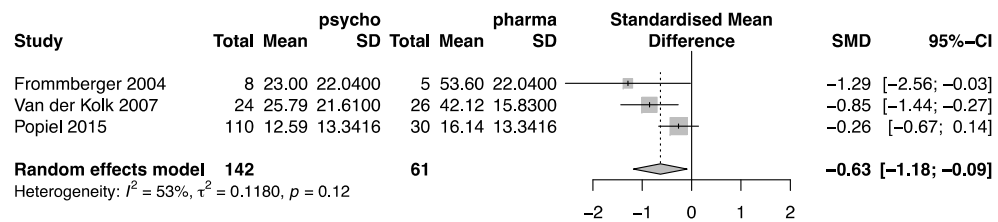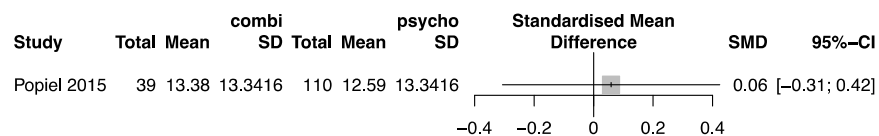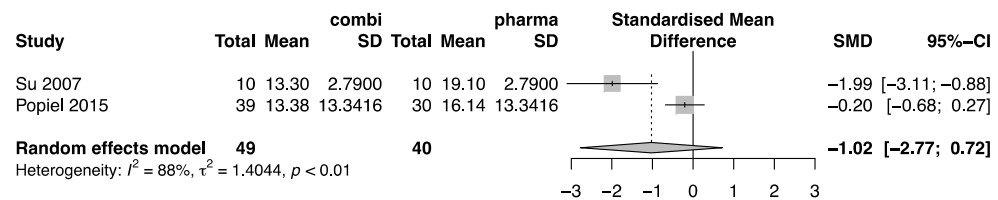

Comparative efficacy on treatment drop outs from pairwise meta-analyses at the end of treatment.

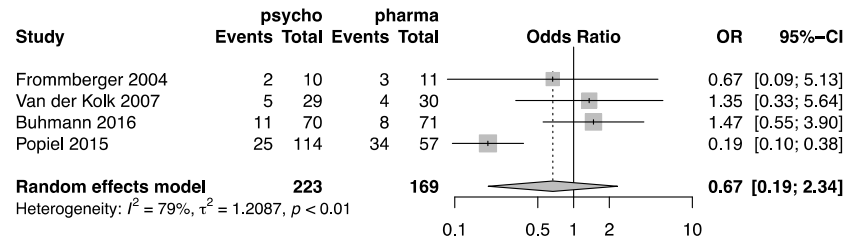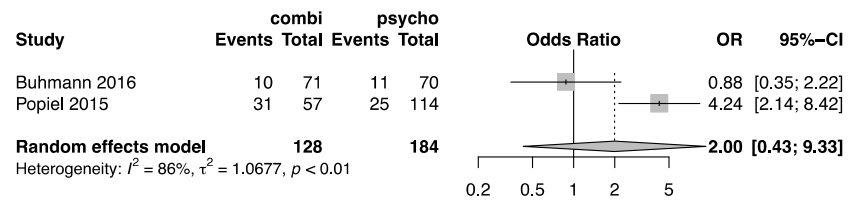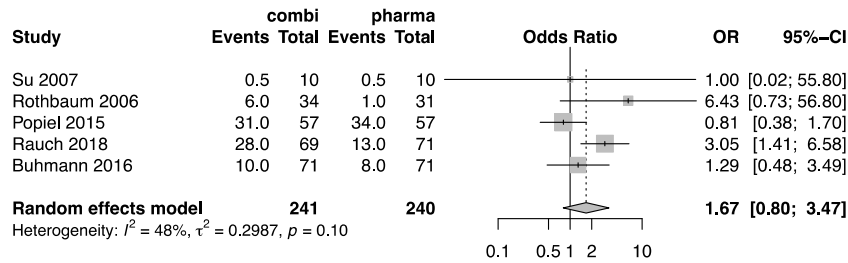

**eFigure 1.** Flow Chart

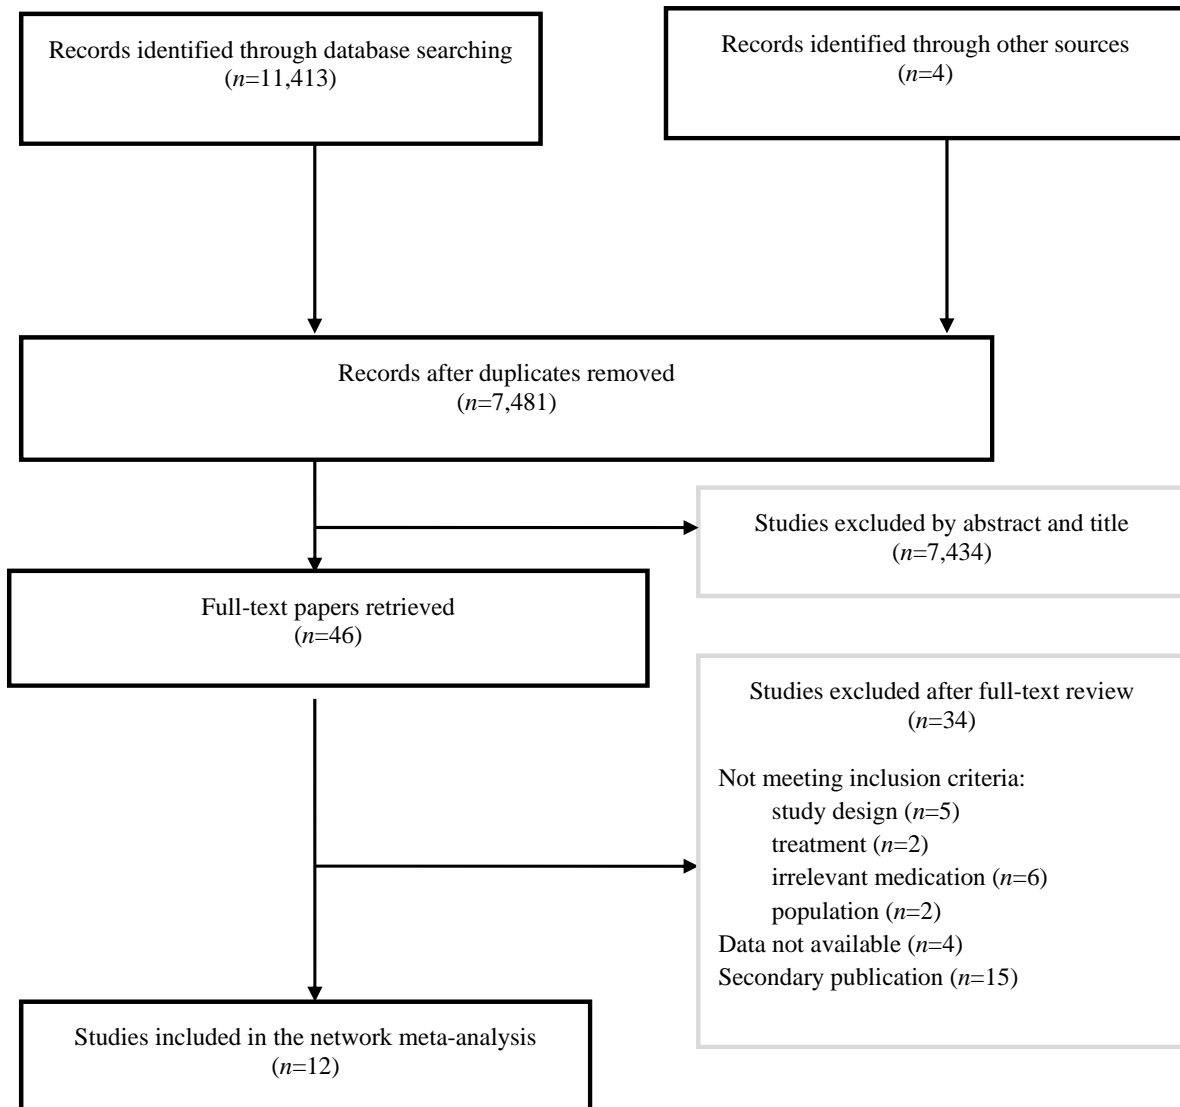

**eFigure 2. Risk of Bias Contributions**

**A. End of treatment**

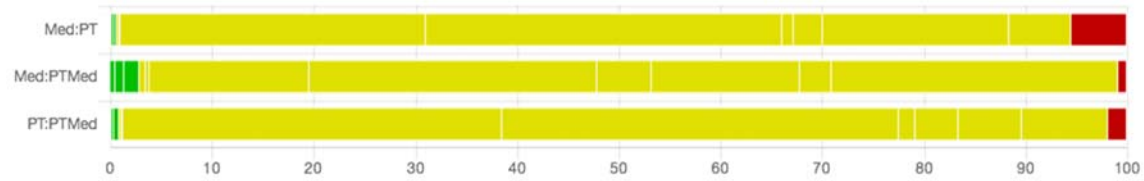

**B. Follow-up**

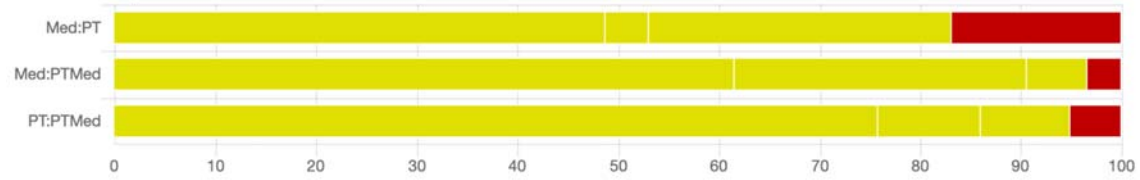



**eFigure 3. Indirectness Contributions**

**A. End of treatment**

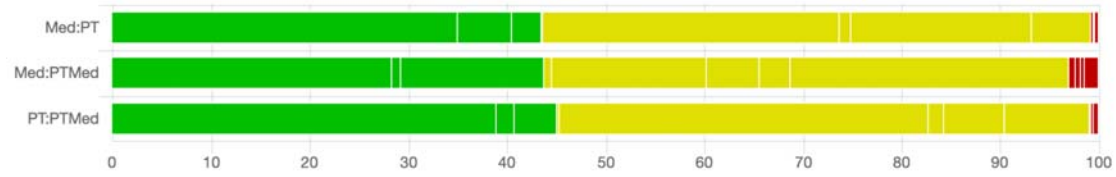

**B. Follow-up**

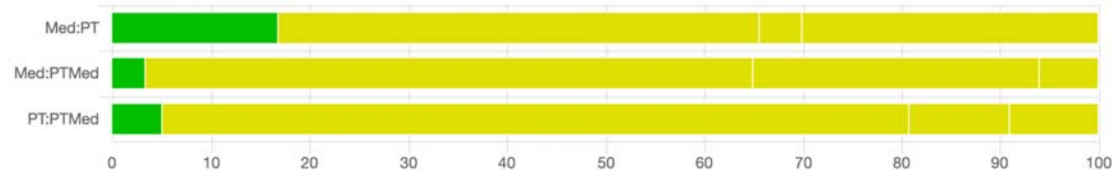

**eTable 1.** Risk of Bias for Each Included Study

| Author                                       | Year | Selection bias | Performance bias | Detection bias | Attrition bias | Reporting bias | RoB      |
|----------------------------------------------|------|----------------|------------------|----------------|----------------|----------------|----------|
| <b>Trials with short-term data only</b>      |      |                |                  |                |                |                |          |
| Buhmann                                      | 2016 | unclear        | low              | low            | high           | low            | moderate |
| Oehen                                        | 2013 | unclear        | low              | low            | unclear        | low            | moderate |
| Rauch                                        | 2018 | unclear        | unclear          | unclear        | unclear        | unclear        | moderate |
| Rothbaum                                     | 2006 | unclear        | high             | low            | low            | low            | moderate |
| Schneier                                     | 2012 | low            | low              | low            | unclear        | low            | low      |
| Simon                                        | 2007 | unclear        | unclear          | low            | low            | low            | moderate |
| <b>Trials with short- and long-term data</b> |      |                |                  |                |                |                |          |
| Frommberger                                  | 2004 | unclear        | low              | high           | high           | high           | high     |
| Hien                                         | 2015 | low            | low              | low            | unclear        | low            | low      |
| Mithoefer                                    | 2010 | low            | low              | low            | unclear        | low            | low      |
| Popiel                                       | 2015 | unclear        | low              | low            | high           | high           | moderate |
| Su                                           | 2007 | unclear        | unclear          | low            | low            | unclear        | moderate |
| Van der Kolk                                 | 2007 | unclear        | low              | low            | unclear        | low            | moderate |

**eTable 2.** Indirectness for Each Included Study

| Author                                       | Year | Population | Intervention               | Outcomes | Comparisons                       | Indirectness total |  |
|----------------------------------------------|------|------------|----------------------------|----------|-----------------------------------|--------------------|--|
| <b>Trials with short-term data only</b>      |      |            |                            |          |                                   |                    |  |
| Buhmann                                      | 2016 | low        |                            | low      |                                   | low                |  |
| Oehen                                        | 2013 | high       | female                     | high     | MDMA                              | high               |  |
| Rauch                                        | 2018 | high       | male                       | low      |                                   | low                |  |
| Rothbaum                                     | 2006 | low        |                            | unclear  | somewhat different implementation | low                |  |
| Schneier                                     | 2012 | low        |                            | low      |                                   | high               |  |
| Simon                                        | 2007 | high       | treatment resistant        | unclear  | somewhat different implementation | high               |  |
| <b>Trials with short- and long-term data</b> |      |            |                            |          |                                   |                    |  |
| Frommberger                                  | 2004 | low        |                            | low      |                                   | low                |  |
| Hien                                         | 2015 | high       | alcohol                    | unclear  | + alcohol treatment               | high               |  |
| Mithoefer                                    | 2010 | high       | female                     | high     | MDMA                              | high               |  |
| Popiel                                       | 2015 | high       | female and highly educated | low      |                                   | low                |  |
| Su                                           | 2007 | unclear    |                            | low      |                                   | unclear            |  |
| Van der Kolk                                 | 2007 | high       | female                     | low      |                                   | low                |  |

**eTable 3: Confidence in Network Meta-analysis (CINEMA) Rating**

A. End of treatment

| Comparison | Number of studies | Within-study bias | Across-studies bias | Indirectness  | Imprecision | Heterogeneity | Incoherence   | Confidence rating |
|------------|-------------------|-------------------|---------------------|---------------|-------------|---------------|---------------|-------------------|
| Med:PT     | 4                 | Some concerns     | Undetected          | Some concerns | No concerns | No concerns   | Some concerns | High              |
| Med:PTMed  | 5                 | Some concerns     | Undetected          | Some concerns | No concerns | No concerns   | Some concerns | High              |
| PT:PTMed   | 2                 | Some concerns     | Undetected          | Some concerns | No concerns | No concerns   | Some concerns | High              |

B. Follow-up

| Comparison | Number of studies | Within-study bias | Across-studies bias | Indirectness  | Imprecision    | Heterogeneity | Incoherence   | Confidence rating |
|------------|-------------------|-------------------|---------------------|---------------|----------------|---------------|---------------|-------------------|
| Med:PT     | 3                 | Some concerns     | Undetected          | Some concerns | Some concerns  | Some concerns | No concerns   | High              |
| Med:PTMed  | 2                 | Some concerns     | Undetected          | Some concerns | Some concerns  | Some concerns | Some concerns | Moderate          |
| PT:PTMed   | 1                 | Some concerns     | Undetected          | Some concerns | Major concerns | No concerns   | No concerns   | Moderate          |

**eTable 4.** Comparisons of Results Across Different Network Models

| Reason for study exclusion                         | No. of studies | PT-Pharma                   | Combi-PT            | Combi-Pharma                | Tau <sup>2</sup> | I <sup>2</sup> |
|----------------------------------------------------|----------------|-----------------------------|---------------------|-----------------------------|------------------|----------------|
| <b>Short-term</b>                                  |                |                             |                     |                             |                  |                |
| None (all studies in)                              | 12             | -0.03 (-.28 to .23)         | -0.09 (-.36 to .19) | -.12 (-.34 to .11)          | .02              | 19.8%          |
| SD imputed                                         | 11             | -.03 (-.27 to .22)          | -.09 (-.36 to .16)  | -.12 (-.34 to .09)          | .01              | 14.3%          |
| High indirectness ratingw                          | 8              | -.01 (-.22 to .21)          | -.10 (-.32 to .13)  | -.10 (-.29 to .09)          | 0                | 0%             |
| Inadequate outcome assessment                      | 11             | -.03 (-.31 to .25)          | -.09 (-.39 to .20)  | -.12 (-.35 to .12)          | .02              | 26.3%          |
| Only short-term data                               | 6              | -.15 (-.66 to .36)          | -.02 (-.69 to .64)  | -.17 (-.80 to .46)          | .12              | 52.8%          |
| Preference for self-rated outcome (all studies in) | 12             | -.10 (-.39 to .18)          | -.04 (-.35 to .26)  | -.14 (-.39 to .10)          | .03              | 29%            |
| <b>Long-term</b>                                   |                |                             |                     |                             |                  |                |
| None (all studies in)                              | <b>6</b>       | <b>-.83 (-1.59 to -.07)</b> | -.13 (-1.13 to .87) | <b>-.96 (-1.88 to -.04)</b> | .33              | 70.8%          |
| SD imputed / inadequate outcome assessment         | 5              | -.72 (-1.60 to .16)         | -.21 (-1.27 to .86) | -.93 (-1.89 to .04)         | .36              | 75.9%          |
| High indirectness rating                           | <b>4</b>       | <b>-.83 (-1.59 to -.07)</b> | -.13 (1.13 to .87)  | <b>-.96 (-1.88 to -.04)</b> | .34              | 72.8%          |
| Preference for self-rated outcome (all studies in) | <b>6</b>       | <b>-.84 (-1.57 to -.11)</b> | -.11 (-1.06 to .84) | <b>-.95 (-1.83 to -.07)</b> | .30              | 68.8%          |
